# Supplementary material for: Cultural Differences in Diet and Determinants of Diet Quality in Switzerland: Results from the National Nutrition Survey menuCH
Source: PubMed Central journal article supplement (PMC6357532; doi:10.3390/nu11010126), 2019-01-09
Supplement: nutrients-11-00126-s001.pdf [file nutrients-11-00126-s001.pdf]

**Table S1:** Components of the Alternate Healthy Eating Index<sup>a,b,c</sup>

| Components                                     | Included food items                                                                                                                                                                        | Criteria for minimum score (0) | Criteria for maximum score (10) | Overall Median [IQR] | German-speaking region Median [IQR] | French-speaking region Median [IQR] | Italian-speaking region Median [IQR] |
|------------------------------------------------|--------------------------------------------------------------------------------------------------------------------------------------------------------------------------------------------|--------------------------------|---------------------------------|----------------------|-------------------------------------|-------------------------------------|--------------------------------------|
| Vegetables (servings/day)                      | All vegetables, leafy vegetables, sprouts, green beans, peas, sweet corn, root vegetables, cabbages, mushrooms, onions, seaweeds, legumes, soups; Except: olives, herbs, vegetables juices | 0                              | ≥ 5                             | 3.0 [1.6 - 4.6]      | 3.0 [1.6 - 4.5]                     | 3.1 [1.7 - 4.8]                     | 3.0 [1.5 - 5.2]                      |
| Fruit (servings/day)                           | All fruits; Except: fruit juices, fruit jams, candied fruit                                                                                                                                | 0                              | ≥ 4                             | 2.8 [0.9 - 5.1]      | 2.7 [0.9 - 5.2]                     | 3.0 [1.0 - 5.0]                     | 2.8 [0.2 - 4.7]                      |
| Whole grains (g/day)                           | All bread products, flours, cereal flakes and bran, dough, pasta, rice, spätzle, other cereal grains                                                                                       | 0                              | ≥ 75                            | 2.7 [0.0 - 5.0]      | 3.0 [0.0 - 5.0]                     | 2.5 [0.0 - 5.0]                     | 0.0 [0.0 - 5.0]                      |
| Women                                          | (quinoa, barley, ...) with a carbohydrates-to-fibre ratio ≤ 10:1                                                                                                                           | 0                              | ≥ 90                            |                      |                                     |                                     |                                      |
| Men                                            |                                                                                                                                                                                            | 0                              | ≥ 90                            |                      |                                     |                                     |                                      |
| SSB/ fruit juices (servings/day) <sup>d</sup>  | Sweetened soft drinks, energy drinks, fizzy drinks, diluted syrup, ice tea, alcoholic drinks substitutes, fruit juices, vegetable juices, smoothies                                        | ≥ 1                            | 0                               | 5.0 [0.6 - 10.0]     | 5.0 [0.0 - 10.0]                    | 5.0 [0.6 - 10.0]                    | 9.7 [4.8 - 10.0]                     |
| Nuts and legumes (servings/day)                | Nuts, seeds, legumes, meat substitutes, soy products                                                                                                                                       | 0                              | ≥ 1                             | 0.0 [0.0 - 4.4]      | 0.0 [0.0 - 4.8]                     | 0.0 [0.0 - 3.7]                     | 0.0 [0.0 - 3.8]                      |
| Red/processed meat (servings/day) <sup>d</sup> | Fresh meat of mammals, offal, wild meat, sausages, cold cuts, smoked and cured meat                                                                                                        | ≥ 1.5                          | 0                               | 5.0 [2.8 - 8.7]      | 5.0 [2.4 - 8.6]                     | 5.0 [3.2 - 8.7]                     | 5.6 [3.7 - 9.1]                      |
| Trans fat (% of energy) <sup>d</sup>           | Margarine, coco fat                                                                                                                                                                        | ≥ 4                            | ≤ 0.5                           | 10.0 [10.0 - 10.0]   | 10.0 [10.0 - 10.0]                  | 10.0 [10.0 - 10.0]                  | 10.0 [10.0 - 10.0]                   |
| Fish (g/day)                                   | Fish, processed fish (fish in crumbs, ...), seafood, processed seafood (surimi, ...)                                                                                                       | 0                              | ≥ 32.4                          | 0.0 [0.0 - 5.0]      | 0.0 [0.0 - 5.0]                     | 0.0 [0.0 - 5.0]                     | 0.0 [0.0 - 5.0]                      |
| PUFA (% of energy)                             |                                                                                                                                                                                            | ≤ 2                            | ≥ 10                            | 2.9 [1.8 - 4.1]      | 2.8 [1.8 - 4.1]                     | 3.0 [2.1 - 4.2]                     | 2.7 [1.7 - 4.0]                      |
| Sodium (mg/day) <sup>d</sup>                   |                                                                                                                                                                                            |                                |                                 | 4.8 [2.5 - 7.0]      | 4.6 [2.5 - 6.7]                     | 5.3 [2.9 - 7.3]                     | 5.1 [3.0 - 7.4]                      |
| Women                                          |                                                                                                                                                                                            | ≥ 3337                         | ≤ 1112                          |                      |                                     |                                     |                                      |
| Men                                            |                                                                                                                                                                                            | ≥ 5271                         | ≤ 1612                          |                      |                                     |                                     |                                      |
| Alcohol (drinks/day) <sup>d</sup>              | Beer, wine, wine products, port, sherry, vermouth, cocktails, liquors, spirits                                                                                                             |                                |                                 | 2.5 [2.5 - 6.2]      | 2.5 [2.5 - 6.2]                     | 2.5 [2.5 - 5.0]                     | 3.7 [2.5 - 6.2]                      |
| Women                                          |                                                                                                                                                                                            | ≥ 2.5                          | 0.5 - 1.5                       |                      |                                     |                                     |                                      |
| Men                                            |                                                                                                                                                                                            | ≥ 3.5                          | 0.5 - 2.0                       |                      |                                     |                                     |                                      |

<sup>a</sup>Adapted from Chiuvè et al. 2012 [1] and Chatelan et al. 2017 [2]

<sup>b</sup>Intermediate food intake was scored proportionately between the minimum and the maximum score

<sup>c</sup>Total score ranges from 0 to 110 points, with 0 indicating minimal adherence and 110 indicating maximal adherence

<sup>d</sup>For the components sugar-sweetened beverages/fruit juices, red/processed meat, trans fat and sodium, a high score corresponds to a low consumption; for the component alcohol, a high score corresponds to a moderate consumption

IQR: interquartile range; PUFA: polyunsaturated fatty acids; SSB: sugar-sweetened beverages

**Table S2:** Components of the Mediterranean Diet Score<sup>a,b</sup>

| Component       | Included food items                                                                                                                                                                                      | Criteria for minimum score (0) <sup>c</sup> | Criteria for maximum score (1) <sup>c</sup> | Overall Median [IQR] | German-speaking region Median [IQR] | French-speaking region Median [IQR] | Italian-speaking region Median [IQR] |
|-----------------|----------------------------------------------------------------------------------------------------------------------------------------------------------------------------------------------------------|---------------------------------------------|---------------------------------------------|----------------------|-------------------------------------|-------------------------------------|--------------------------------------|
| Vegetables      | All vegetables, leafy vegetables, sprouts, green beans, peas, sweet corn, root vegetables, cabbages, mushrooms, onions, seaweeds; Except: olives, herbs, vegetables juices                               | Below the median                            | Above the median                            | 0.5 [0.0 - 1.0]      | 0.5 [0.0 - 1.0]                     | 0.5 [0.0 - 1.0]                     | 0.5 [0.0 - 1.0]                      |
| Legumes         | Legumes                                                                                                                                                                                                  | Below the median                            | Above the median                            | 0.0 [0.0 - 0.0]      | 0.0 [0.0 - 0.0]                     | 0.0 [0.0 - 0.0]                     | 0.0 [0.0 - 0.0]                      |
| Fruits and nuts | All fruits, nuts, seeds; Except: fruit juices, fruit jams, candied fruit                                                                                                                                 | Below the median                            | Above the median                            | 0.5 [0.0 - 1.0]      | 0.5 [0.0 - 1.0]                     | 0.5 [0.0 - 1.0]                     | 0.5 [0.0 - 1.0]                      |
| Cereal          | All bread products, flours, cereal flakes and bran, dough, pasta, rice, spätzle, other cereal grains (quinoa, barley, ...), cakes, biscuits, pies, potatoes, potato-based products (gnocchi, rösti, ...) | Below the median                            | Above the median                            | 0.5 [0.0 - 1.0]      | 0.5 [0.0 - 1.0]                     | 0.5 [0.0 - 1.0]                     | 0.5 [0.0 - 0.5]                      |
| Fish            | Fish, processed fish (fish in crumbs, ...), seafood, processed seafood (surimi, ...)                                                                                                                     | Below the median                            | Above the median                            | 0.0 [0.0 - 0.5]      | 0.0 [0.0 - 0.5]                     | 0.0 [0.0 - 0.5]                     | 0.0 [0.0 - 0.5]                      |
| Meat            | Fresh meat of mammals, fresh meat of poultry, offal, wild meat, sausages, cold cuts, smoked and cured meat                                                                                               | Above the median                            | Below the median                            | 0.5 [0.0 - 1.0]      | 0.5 [0.0 - 1.0]                     | 0.5 [0.0 - 1.0]                     | 0.5 [0.0 - 1.0]                      |
| Dairy products  | Milk, fermented milk drinks, buttermilk, yogurt, yogurt drinks, fermented milk and kefir, fresh cheese, soft cheese, hard cheese, cream, desserts made with dairy products, ice creams, sorbets          | Above the median                            | Below the median                            | 0.5 [0.0 - 1.0]      | 0.5 [0.0 - 1.0]                     | 0.5 [0.4 - 1.0]                     | 0.5 [0.5 - 1.0]                      |
| Alcohol         |                                                                                                                                                                                                          |                                             |                                             | 0.0 [0.0 - 0.5]      | 0.0 [0.0 - 0.5]                     | 0.0 [0.0 - 0.5]                     | 0.3 [0.0 - 0.5]                      |

|            |                                                   |                          |                  |                 |                 |                 |               |
|------------|---------------------------------------------------|--------------------------|------------------|-----------------|-----------------|-----------------|---------------|
| Women      |                                                   | < 5 g/day or > 25 g/day  | 5 - 25 g/day     |                 |                 |                 |               |
| Men        |                                                   | < 10 g/day or > 50 g/day | 10 - 50 g/day    |                 |                 |                 |               |
| Fat intake | Ratio of monounsaturated to saturated fatty acids | Below the median         | Above the median | 0.5 [0.0 – 1.0] | 0.5 [0.0 – 1.0] | 0.5 [0.0 – 1.0] | 0.5 [0.5 1.0] |

<sup>a</sup>Adapted from Chatelan et al. 2017 [2]

<sup>b</sup>Total score ranges from 0 to 9 points, with 0 indicating minimal adherence and 9 indicating maximal adherence to the traditional Mediterranean diet

<sup>c</sup>Medians are sex-specific

IQR: interquartile range

**Table S3:** Weighted median [IQR] of each Alternate Healthy Eating Index (AHEI) component and differences between language regions (n=2,057)<sup>a,b</sup>

|                                 | German-speaking region <sup>e</sup> | French-speaking region <sup>e</sup> | Italian-speaking region <sup>e</sup> | Overall              | German vs. French      | French vs. Italian     | German vs. Italian     |
|---------------------------------|-------------------------------------|-------------------------------------|--------------------------------------|----------------------|------------------------|------------------------|------------------------|
|                                 | Median [IQR]                        | Median [IQR]                        | Median [IQR]                         | p-value <sup>c</sup> | p-value <sup>c,d</sup> | p-value <sup>c,d</sup> | p-value <sup>c,d</sup> |
| Vegetables                      | 2.99 [1.62 - 4.51]                  | 3.12 [1.71 - 4.78]                  | 3.02 [1.46 - 5.17]                   | 0.74                 | 1                      | 1                      | 1                      |
| Fruit                           | 2.69 [0.88 - 5.15]                  | 3.00 [0.99 - 5.04]                  | 2.79 [0.22 - 4.74]                   | 0.37                 | 1                      | 0.50                   | 0.80                   |
| Whole grains                    | 2.98 [0.00 - 5.00]                  | 2.48 [0.00 - 5.00]                  | 0.00 [0.00 - 5.00]                   | <0.01                | 0.25                   | 0.03                   | <0.01                  |
| SSB/fruite juices <sup>f</sup>  | 5.00 [0.00 - 10.00]                 | 5.00 [0.59 - 10.00]                 | 9.68 [4.85 - 10.00]                  | <0.01                | 0.15                   | 0.01                   | <0.01                  |
| Nuts and legumes                | 0.00 [0.00 - 4.84]                  | 0.00 [0.00 - 3.69]                  | 0.00 [0.00 - 3.77]                   | 0.09                 | 0.33                   | 1                      | 0.20                   |
| Red/processed meat <sup>f</sup> | 5.00 [2.37 - 8.61]                  | 5.00 [3.19 - 8.75]                  | 5.56 [3.75 - 9.11]                   | 0.20                 | 0.62                   | 1                      | 0.35                   |
| Trans fat <sup>g</sup>          | 10.00 [10.00 - 10.00]               | 10.00 [10.00 - 10.00]               | 10.00 [10.00 - 10.00]                | <0.01                | <0.01                  | 0.35                   | <0.01                  |
| Fish <sup>g</sup>               | 0.00 [0.00 - 5.00]                  | 0.00 [0.00 - 5.00]                  | 0.00 [0.00 - 5.00]                   | <0.01                | <0.01                  | 1                      | <0.01                  |
| PUFA                            | 2.85 [1.75 - 4.12]                  | 2.99 [2.06 - 4.20]                  | 2.66 [1.67 - 4.03]                   | 0.17                 | 0.80                   | 0.19                   | 0.65                   |
| Sodium <sup>f</sup>             | 4.58 [2.47 - 6.73]                  | 5.29 [2.92 - 7.29]                  | 5.14 [2.97 - 7.44]                   | 0.01                 | 0.01                   | 1                      | 0.23                   |
| Alcohol <sup>f</sup>            | 2.50 [2.50 - 6.25]                  | 2.50 [2.50 - 5.00]                  | 3.66 [2.50 - 6.25]                   | <0.01                | 0.03                   | <0.01                  | 0.01                   |

<sup>a</sup>The weighted median [IQR] of the participants is represented for each language region

<sup>b</sup>All results were weighted for sex, age, marital status, major area of Switzerland, nationality, household size, season and weekday

<sup>c</sup>p-values were derived from Kruskal-Wallis tests; bolded values represent statistically significant results (p-value<0.05)

<sup>d</sup>Bonferroni correction was applied to adjust for multiple testing

<sup>e</sup>German-speaking region: canton Aargau, Basel-Land, Basel-Stadt, Bern, Lucerne, St. Gallen, Zurich; French-speaking regions: canton Geneva, Jura, Neuchatel, Vaud; Italian-speaking regions: canton Ticino

<sup>f</sup>For the components sugar-sweetened beverages/fruit juices, red/processed meat, trans fat and sodium, a high score corresponds to a low consumption; for the component alcohol, a high score corresponds to a moderate consumption

<sup>g</sup>Similar values are due to a very skewed distribution

IQR: interquartile range; PUFA: polyunsaturated fatty acids; SSB: sugar-sweetened beverages

#### Supplementary references:

1. Chiuve, S. E.; Fung, T. T.; Rimm, E. B.; Hu, F. B.; McCullough, M. L.; Wang, M.; Stampfer, M. J.; Willett, W. C. Alternative dietary indices both strongly predict risk of chronic disease. *J. Nutr.* **2012**, *142*, 1009–1018, doi:10.3945/jn.111.157222.
2. Chatelan, A.; Beer-Borst, S.; Randriamiharisoa, A.; Pasquier, J.; Blanco, J. M.; Siegenthaler, S.; Paccaud, F.; Slimani, N.; Nicolas, G.; Camenzind-Frey, E.; Zuberbuehler, C. A.; Bochud, M. Major differences in diet across three linguistic regions of Switzerland: Results from the first national nutrition survey menuCH. *Nutrients* **2017**, *9*, 1–17, doi:10.3390/nu9111163.
